# Supplementary figures and images for: Regions within a single epidermal cell of Drosophila can be planar polarised independently
Source: eLife journal article supplement (doi:10.7554/elife.06303), 2015-02-11

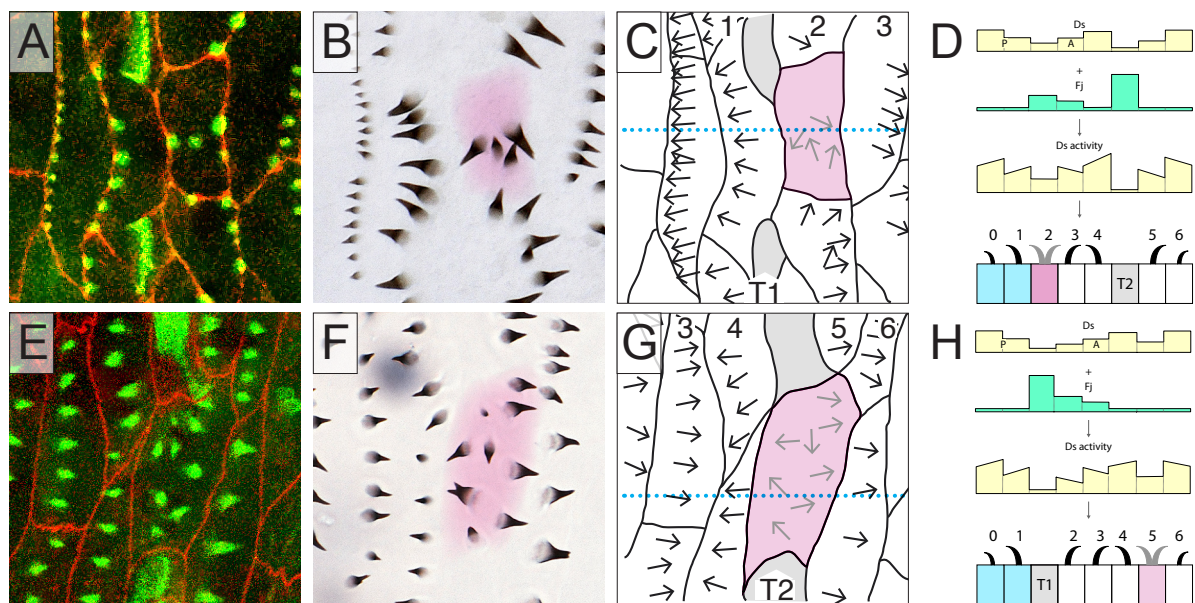

Supplement: supp [file elife-06303-supp-v1.zip]

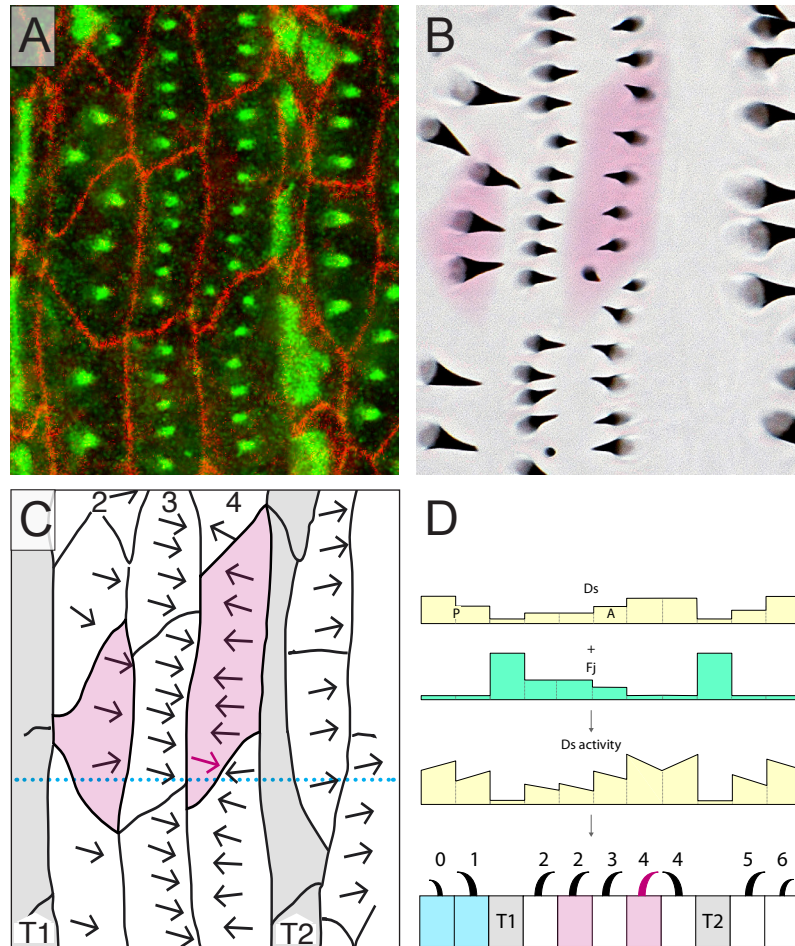

Supplement: supp [file elife-06303-supp-v1.zip]
